# Supplementary material for: Molecular architecture of the kinetochore–microtubule interface
Source: Springer Nature journal article supplement (doi:10.1038/nrm2310), 2007-12-21
Supplement: nrm2310-s1.pdf [file nrm2310-s1.pdf]

**Supplementary information S1 (table) | Human kinetochore proteins identified to date with their likely homologues in budding yeast, fission yeast, nematodes, fruit fly and plants.**

| Complex       | Human          | Alternate names                            | <i>S. pombe</i>     | <i>S. cerevisiae</i> | <i>C. elegans</i> | <i>D. melanogaster</i> | <i>A. thaliana</i> |
|---------------|----------------|--------------------------------------------|---------------------|----------------------|-------------------|------------------------|--------------------|
|               | CENP-A         | CENH3                                      | Cnp1                | Cse4                 | HCP-3/<br>CENP-A  | CID                    | CENH3/<br>HTR12    |
|               | CENP-B         |                                            | Abp1, Cbh1,<br>Cbh2 |                      |                   |                        |                    |
| CCAN          | CENP-C         |                                            | Cnp3                | Mif2                 | HCP-4/<br>CENP-C  | Cenp-C/<br>CG31258     | CENP-C             |
| CCAN          | CENP-H         |                                            | Fta3                | Mcm16                |                   |                        |                    |
| CCAN          | CENP-I         | MIS6; LRPR1                                | Mis6                | Ctf3                 |                   |                        |                    |
| CCAN          | CENP-K         | Solt; AF-5 $\alpha$ ;<br>FKSG14;<br>ICEN37 | Sim4                |                      |                   |                        |                    |
| CCAN          | CENP-50        | CENP-U;<br>MLF1IP;<br>PBIP1;<br>ICEN24     |                     |                      |                   |                        |                    |
| CCAN          | CENP-O         | MCM21R;<br>MGC11266;<br>ICEN36             | Mal2                | Mcm21                |                   |                        |                    |
| CCAN          | CENP-P         | LOC401541                                  | Fta2                | Ctf19                |                   |                        |                    |
| CCAN          | CENP-Q         | FLJ10545                                   | Mis17               |                      |                   |                        |                    |
| CCAN          | CENP-R         | ITGB3BP                                    |                     |                      |                   |                        |                    |
| CCAN          | CENP-L         | FTA1R;<br>dJ383J4.3;<br>ICEN33             | Fta1                |                      |                   |                        |                    |
| CCAN          | CENP-M         | PANE1;<br>ICEN39                           |                     |                      |                   |                        |                    |
| CCAN          | CENP-N         | Chl4R;<br>BM039                            | Mis15               | Chl4                 |                   |                        |                    |
| CCAN          | CENP-T         | FLJ1311;<br>ICEN22                         |                     |                      |                   |                        |                    |
| CCAN          | CENP-S         |                                            |                     |                      |                   |                        |                    |
| Mis18 complex | MIS18 $\alpha$ | C21orf45                                   | Mis18               |                      |                   |                        |                    |
| Mis18 complex | MIS18 $\beta$  | Opa-interacting protein 5                  | Mis18               |                      |                   |                        |                    |
| Mis18 complex | KNL2           | M18BP1;<br>C14orf106                       |                     |                      | KNL-2             |                        |                    |
| Mis12 complex | MIS12          |                                            | Mis12               | Mtw1                 | MIS-12            | CG18156                | Mis12              |
| Mis12 complex | DSN1           | Q9H410;<br>C20orf172                       | Mis13/Dsn1          | Dsn1                 | KNL-3             |                        |                    |
| Mis12 complex | NNF1           | PMF1                                       | Nnf1                | Nnf1                 | KBP-1             | CG13434/C<br>G31658    |                    |
| Mis12 complex | NSL1           | DC31                                       | Mis14/Nsl1          | Nsl1                 | KBP-2             | CG1558                 |                    |
| Ndc80 complex | NDC80          | HEC1                                       | Ndc80               | Ndc80                | NDC-80            | CG9938-PA              |                    |
| Ndc80 complex | NUF2           |                                            | Nuf2                | Nuf2                 | HIM-10            | CG8902                 | Nuf2               |
| Ndc80 complex | SPC24          |                                            | Spc24               | Spc24                | KBP-4             | CG7242                 |                    |
| Ndc80         | SPC25          |                                            | Spc25               | Spc25                | KBP-3             |                        |                    |

|                    |                          |                                  |             |                     |                 |                    |                     |
|--------------------|--------------------------|----------------------------------|-------------|---------------------|-----------------|--------------------|---------------------|
| complex            |                          |                                  |             |                     |                 |                    |                     |
|                    | KNL1                     | AF15q14;<br>CASC5; D40           | Spc7        | Spc105              | KNL-1           | CG11451            |                     |
|                    | Zwint                    |                                  |             |                     | KBP-5?          |                    |                     |
| RZZ complex        | ROD                      |                                  | -           | -                   | ROD-1           | ROD                |                     |
| RZZ complex        | ZW10                     |                                  | -           | -                   | CZW-1           | ZW10               | ZW10                |
| RZZ complex        | Zwilch                   |                                  | -           | -                   | ZWL-1           | Zwilch             |                     |
|                    | CENP-F                   | Mitotin                          |             |                     | HCP-1/2?        |                    |                     |
|                    | Spindly                  | Coiled-coil domain-containing 99 |             |                     | C06A8.5         | Spindly/CG 15415   |                     |
|                    | Dynein                   |                                  |             | Not at kinetochores | DHC-1           | Several DHCs       | Absent              |
|                    | NDE1                     |                                  |             |                     | NUD-2           |                    |                     |
|                    | NDEL1                    |                                  |             |                     | NUD-2           |                    |                     |
|                    | NUDC                     |                                  |             |                     | NUD-1           |                    |                     |
|                    | LIS1                     |                                  |             |                     | LIS-1           |                    |                     |
|                    | SKA1                     | C18orf24                         |             |                     | Y106G6H.1 5     |                    | AT3G60660           |
|                    | SKA2                     | Fam33A                           |             |                     |                 |                    |                     |
|                    | CLASP1, CLASP2           |                                  | Peg1        | Stu1                | CLS-2           | MAST/Orbit         |                     |
|                    | CLIP170                  | Restin                           | Tip1        | Bik1                | M01A8.2         |                    |                     |
|                    | EB1                      |                                  | Mal3        | Bim1                | EBP-1 and EBP-2 |                    |                     |
|                    | TOG                      | XMAP215                          | Dis1, Alp14 | Stu2                | ZYG-9           | Msp5               | MOR1                |
|                    | Kif2A, Kif2B, Kif2C/MCAK | Kinesin-13; XKCM1                |             |                     | KLP-7           | KLP10A, KLP59C     | KINESIN-13A; MSL1.9 |
|                    | ICIS                     |                                  |             |                     |                 |                    |                     |
|                    | KIF18A                   | Kinesin-8                        | Klp5/6      | Kip3                | KLP-13          | KLP67A             |                     |
|                    | CENP-E                   |                                  | -           | -                   | -               | CENP-meta/CENP-ana |                     |
| Mitotic checkpoint | MAD1                     |                                  | Mad1        | Mad1                | MDF-1           |                    |                     |
| Mitotic checkpoint | BUB1                     |                                  | Bub1        | Bub1                | BUB-1           | Bub1               |                     |
| Mitotic checkpoint | BUB3                     |                                  | Bub3        | Bub3                | BUB-3           | Bub3               |                     |
| Mitotic checkpoint | BUBR1                    |                                  | Mad3        | Mad3                | SAN-1           | BubR1              |                     |

|                              |                    |              |                     |                     |          |          |             |
|------------------------------|--------------------|--------------|---------------------|---------------------|----------|----------|-------------|
| Mitotic checkpoint           | MAD2               |              | Mad2                | Mad2                | MDF-2    | Mad2     |             |
| Mitotic checkpoint           | CDC20              |              | Slp1                | Cdc20               | FZY-1    | Fzy      |             |
| Mitotic checkpoint           | MPS1               | TTK          | Mph1                | Mps1                | -        | Mps1/ald |             |
| Mitotic checkpoint           | PICH               | FLJ20105     | -                   | -                   | -        | -        | AT5G63950   |
| Mitotic checkpoint           | TAO1               | MARKK        |                     |                     |          |          |             |
| Chromosome passenger complex | Aurora B           |              | Ark1                | lpl1                | AIR-2    | Aurora B |             |
| Chromosome passenger complex | INCENP             |              | Plc1                | Sli15               | ICP-1    | INCENP   |             |
| Chromosome passenger complex | Survivin           |              | Bir1/Cut7           | Bir1                | BIR-1    |          |             |
| Chromosome passenger complex | Borealin           | Dasra        |                     |                     | CSC-1    |          |             |
|                              | TD60               |              |                     |                     |          |          |             |
|                              | SGO1               | SGOL1        | Sgo1                | Sgo1                | C33H5.15 | MEI-S332 | AT3G10440.1 |
|                              | SGO2               | SGOL2/TRIP1N | Sgo2                |                     |          |          | AT5G04420.1 |
|                              | PP2A               |              |                     |                     | PPH-5    |          |             |
|                              | PP1 $\gamma$       |              |                     | Glc7                | GSP-1/2  |          |             |
|                              | Polo-like kinase 1 | PLK1         | Plo1                | Cdc5                | PLK-1    | Polo     |             |
| Nup107-160 complex           | NUP107             |              | Not at kinetochores | Not at Kinetochores | NPP-5    | Nup107   |             |
| Nup107-160 complex           | NUP85              |              |                     |                     | NPP-2    |          |             |
| Nup107-160 complex           | NUP133             |              |                     |                     | NPP-15   |          |             |
| Nup107-160 complex           | NUP160             |              |                     |                     | NPP-6    |          |             |
| Nup107-160 complex           | NUP96              |              |                     |                     | NPP-10   |          |             |
| Nup107-160 complex           | NUP120             |              |                     |                     |          |          |             |
| Nup107-160 complex           | Nup37              |              |                     |                     |          |          |             |
| Nup107-160 complex           | NUP43              |              |                     |                     |          |          |             |
| Nup107-160 complex           | SEC13              |              |                     |                     | NPP-20   |          |             |
| Nup107-160 complex           | SEH1               |              |                     |                     | NPP-18   |          |             |
|                              | ELYS               |              |                     |                     | MEL-28   |          |             |
|                              | CRM1               |              | CRM1                |                     | IMB-4    | emb      |             |
|                              | RanBP2             | NUP358       |                     |                     | NPP-9    |          |             |
|                              | RanGAP1            |              |                     |                     | RAN-2    |          |             |
